# Supplementary material for: Myo-Inositol Levels in the Dorsal Hippocampus Serve as Glial Prognostic Marker of Mild Cognitive Impairment in Mice
Source: Frontiers journal article supplement (doi:10.3389/fnagi.2021.731603), 2021-11-12
Supplement: Data_Sheet_1.PDF [file Data_Sheet_1.PDF]

|                                                                                                                                                                                                                                               |                                                                                                                                       |
|-----------------------------------------------------------------------------------------------------------------------------------------------------------------------------------------------------------------------------------------------|---------------------------------------------------------------------------------------------------------------------------------------|
| <b>1. Hardware</b>                                                                                                                                                                                                                            |                                                                                                                                       |
| a. Field strength [T]                                                                                                                                                                                                                         | 9.4T                                                                                                                                  |
| b. Manufacturer                                                                                                                                                                                                                               | BRUKER                                                                                                                                |
| c. Model (software version if available)                                                                                                                                                                                                      | Biospec 94/20 system, ParaVision 6.0.1                                                                                                |
| d. RF coils: nuclei (transmit/receive), number of channels, type, body part                                                                                                                                                                   | i) two channel transmit/receive cryo coil<br>ii) whole body coil (transmission) / room temperature 2x2 array surface coil (detection) |
| e. Additional hardware                                                                                                                                                                                                                        | -                                                                                                                                     |
| <b>2. Acquisition</b>                                                                                                                                                                                                                         |                                                                                                                                       |
| a. Pulse sequence                                                                                                                                                                                                                             | PRESS                                                                                                                                 |
| b. Volume of interest (VOI) locations                                                                                                                                                                                                         | dorsal and ventral hippocampus                                                                                                        |
| c. Nominal VOI size [cm <sup>3</sup> , mm <sup>3</sup> ]                                                                                                                                                                                      | 2.5 × 1.5 × 1.5 mm <sup>3</sup>                                                                                                       |
| d. Repetition time (TR), echo time (TE) [ms, s]                                                                                                                                                                                               | TR=5000 ms; TE=16.5 ms                                                                                                                |
| e. Total number of excitations or acquisitions per spectrum                                                                                                                                                                                   | 128 averages                                                                                                                          |
| In time series for kinetic studies                                                                                                                                                                                                            |                                                                                                                                       |
| i. Number of averaged spectra (NA) per time point                                                                                                                                                                                             |                                                                                                                                       |
| ii. Averaging method (eg block-wise or moving average)                                                                                                                                                                                        |                                                                                                                                       |
| iii. Total number of spectra (acquired/in time series)                                                                                                                                                                                        |                                                                                                                                       |
| f. Additional sequence parameters (spectral width in Hz, number of spectral points, frequency offsets)<br>If STEAM: mixing time <sup>TM</sup><br>If MRSI: 2D or 3D, FOV in all directions, matrix size, acceleration factors, sampling method | 4041.41 Hz, 2048 points                                                                                                               |
| g. Water suppression method                                                                                                                                                                                                                   |                                                                                                                                       |
| h. Shimming method, reference peak, and thresholds for "acceptance of shim" chosen                                                                                                                                                            | MAPSHIM                                                                                                                               |
| i. Triggering or motion correction method (respiratory, peripheral, cardiac triggering, incl. device used and delays)                                                                                                                         | -                                                                                                                                     |
| <b>3. Data analysis methods and outputs</b>                                                                                                                                                                                                   |                                                                                                                                       |
| a. Analysis software                                                                                                                                                                                                                          | LCModel 6.3                                                                                                                           |
| b. Processing steps deviating from quoted reference or product                                                                                                                                                                                | -                                                                                                                                     |
| c. Output measure (eg absolute concentration, institutional units, ratio), processing steps deviating from quoted reference or product                                                                                                        | ratio to total creatine                                                                                                               |
| d. Quantification references and assumptions, fitting model assumptions                                                                                                                                                                       | LCModel default basis                                                                                                                 |
| <b>4. Data quality</b>                                                                                                                                                                                                                        |                                                                                                                                       |
| a. Reported variables (SNR, linewidth (with reference peaks))                                                                                                                                                                                 | see suppl. table 1                                                                                                                    |
| b. Data exclusion criteria                                                                                                                                                                                                                    | CRLB>14%, FWHM>0.118ppm, SNR<7 (cryocoil) / SNR<3 (room temp. coil)                                                                   |
| c. Quality measures of postprocessing model fitting (eg CRLB, goodness of fit, SD of residual)                                                                                                                                                | see 4b                                                                                                                                |
| d. Sample spectrum                                                                                                                                                                                                                            | see suppl. figure 1                                                                                                                   |
